## **Application and content of minimum data sets for care homes: A mapping review**

### **Authors**

Hanratty Barbara, Newcastle University UK

Akdur Gizdem, University of Hertfordshire, UK

Burton Jennifer Kirsty, University of Glasgow, UK

Davey Vanessa, Newcastle University, UK

Goodman Claire, University of Hertfordshire, UK

Gordon Adam Lee, University of Nottingham, UK

Killett Anne, University of East Anglia, UK

Liddle Jenny, Newcastle University, UK

Rand Stacey, University of Kent, UK

Spilsbury Karen, University of Leeds, UK

Towers Ann-Marie, University of Kent, UK

## Abstract

**Background:** Care home residents have complex needs, and minimum data sets (MDSs) provide a unique source of information on their health and wellbeing. Although MDSs were first developed to monitor quality and costs of care, they can make an important contribution to research.

**Aim:** To describe the research applications of data from care home MDSs, and identify key outcome variables and measures used.

**Design:** Mapping review of published empirical studies using data generated from minimum data sets in long term care facilities for older adults.

**Methods:** We performed a comprehensive search of electronic databases (Medline OVID, CINAHL, Embase and ASSIA), using bespoke search strategies to identify English language publications 2011 - 2024. Articles were screened by two independent reviewers. They were grouped by study topic and data (on publication date, country, MDS, outcome variables and specific items or measures) were charted without quality assessment. The key features of the data are described in a narrative synthesis.

## Findings

Searches identified 18588 articles published 2011-2024, of which 661 met inclusion criteria. 72% were from the USA, 12% from Canada and the remaining 16% from four European countries, South Korea and New Zealand. The studies encompassed individual resident functioning (e.g. mobility, incontinence), health conditions and symptoms (e.g. depression, pain), healthcare in the home (e.g. prescribing, end of life care), hospital attendances and admissions, transitions to and from care homes, quality of care and systemwide issues. Measures used reflected the content of the major MDSs, but there was a mismatch between the importance of some topics to care homes (e.g. incontinence) and the range of published papers, and limited consensus over how to measure quality of life.

## Conclusions

Care home MDSs are a unique resource to support study of care home residents and impact of interventions over time. They are a powerful resource when linked to other datasets, and as an adjunct to primary data collection This analysis may serve as an accessible guide to the content and applications of MDS, allowing researchers to consider the sort of questions that can be posed and the different components of resident care or experience that can be evaluated.

## Introduction

Care home residents have complex needs, and a good understanding of their health and wellbeing is the key to optimising care.<sup>1 2</sup> This is an important group, growing in size and with increasing needs for care.<sup>3 4</sup> Over the next twenty years, the number of people requiring the level of support provided by a care home is expected to increase by 50%, in line with population ageing.<sup>5 6</sup> Research from Europe, New Zealand and North America has described rising care needs and acuity of medical conditions amongst care home entrants.<sup>7 8</sup> Older age, cognitive impairment and difficulties with activities of daily living (ADLs) are established risk factors for care home admission.<sup>9</sup> Three out of four residents have reduced mobility and a similar proportion live with incontinence.<sup>10</sup> Arthritis, depression and dementia are common,<sup>1 10</sup> and an increasing number of residents are admitted directly from hospitals, with associated needs for rehabilitation and infection control.<sup>6</sup> Demands on health services may be high, with greater use of primary care by older adults in care homes, compared to people in their own homes, more frequent hospital attendances<sup>10</sup> and high rates of in-hospital death.<sup>11</sup>

A minimum data set (MDS) describes a core dataset, collected for a specific purpose. Most often, MDSs are focused on demographic, social, economic or health characteristics. Care home MDSs may provide data on individual residents, staff and homes, which can be aggregated to study activity at care home, organisation or population levels. Over time, the resulting longitudinal data on residents' and their home can be a resource to support planning, delivery and evaluation of services tailored to residents' needs.<sup>12</sup> An MDS can also enable national reporting on care metrics, cross-national comparative studies, and - in conjunction with other healthcare record systems - studies of how older adults move between care homes, hospitals and the wider community.<sup>13 14</sup> An MDS for care homes has been used in the USA for almost 30 years, where Medicaid and Medicare affiliated care homes are now mandated to use the it (currently version 3.0).<sup>15</sup> Two other forms of MDS, the Resident Assessment Instrument and Dutch National Measurement of Care Problems (LPZ)<sup>16-20</sup> are in use elsewhere. All MDSs specify the schedule and content of assessments, support standardised data collection, and provide protocols to guide assessment, and in some cases, triggers for escalation of care. Established MDS are lengthy tools, with the US MDS version 3.0 consisting of over 400 items.<sup>15</sup> They form part of a vast array of tools, available to use with care home populations. A recent review of quality management guidelines and frameworks for care homes from seven European countries and the US identified 94 performance indicators across five domains. The quality of care domain alone included 24 indicators.<sup>21</sup>

Many countries have no regular sources of data from care homes and no reliable means of identifying care home residents within routine data sources.<sup>22</sup> The coronavirus pandemic that started in 2020 highlighted the importance of this omission, and the potential benefits of data collection for residents, care systems and research. Data on activity and COVID-19 infection in care homes were needed urgently, but infrastructure to support data collection and transfer were often absent. In countries without MDS or similar systems, there are examples of swift action to redress this information gap. For example, in England, a capacity tracker app was used to provide aggregate information such as care home bed occupancy and staffing, to local authorities.<sup>23</sup> This and other interventions during the pandemic, heightened interest in the potential of MDS to support responses to emergencies and rational planning, as well as research.

The purpose of this study was twofold. First, to provide an overview of the breadth of topics that may be studied using data from care home MDS. Second, to map the key measures used within each topic area. We did this to generate a resource for researchers, with a guide to where MDS has supported research, and where the gaps are.

## Methods

We undertook a mapping review of the published literature. This was judged to be the most appropriate approach, as we were interested in a broad overview of the content of a large literature. It allows researchers to map and describe the literature in a specific area, and highlight important concepts.<sup>24</sup> We adopted the established standards for the conduct of these type of reviews.<sup>25,26-28</sup> In keeping with the mapping review approach, we extracted limited, descriptive information about studies. The purpose was to understand how MDS data has been used in research and identify items/measures used in common topic areas of MDS research. Throughout this review, we use the terms 'items/variables' to describe responses to single items or questions and 'measures' to describe multiple items (more than two) forming a measurement scale.

## Search Strategy

This work utilised broad searches developed for a linked review.<sup>29</sup> Initially, a bespoke search strategy was developed with an information scientist to identify original studies analysing data from care home MDSs. It was used to search seven data bases (Medline OVID, SCOPUS, CINAHL, Embase, ASSIA) from 2011 to 2015, subsequently updated to 2019.<sup>29</sup> (Search strategies reported elsewhere and reproduced in the Supplementary Material).<sup>29</sup> Further updating was undertaken to 2024. This

provides fourteen full years of publications, with recent data most likely to reflect current practice. Additional targeted searches used the names of MDSs known to be implemented (e.g. MDS, InterRAI, LPZ) and by manually searching the reference lists of potentially relevant papers and sources of grey literature, including websites of MDS providers. References were imported into Endnote software for screening.

### **Inclusion and exclusion criteria**

Studies were included if they reported original research, using data from an MDS in care homes (care home, residential home, long-term care facility, skilled nursing facility). Studies that described development of an MDS, validated measures within MDSs, or used measures taken from MDSs to undertake data collection, were all excluded. We included articles that combined analysis of previously collected MDS data with new data collection in a single study. No restrictions on language, country, age of study participants, type of care home or study topic were applied at this stage. All observational and experimental study designs were eligible, but editorials, reviews, commentaries and conference abstracts were excluded. Included studies were published between January 2011 and March 2024, to ensure the findings reflected recent practice in care homes.

### **Title and abstract, full text screening**

Title, abstract and full text screening were all completed in EndNote. One reviewer screened all records, with 20% checked by a second reviewer. All uncertainties were resolved by discussion between two reviewers, with a third reviewer available to intervene in the event of conflicts. Studies that presented analysis of MDS data were included for data extraction.

### **Data charting**

A data charting form was developed in Microsoft Excel, tested on ten articles and modified before applying to all included studies. Descriptive data were charted from each article that met the inclusion criteria: year of publication, country, study topic, MDS, and items or measures in the topic area being studied.

Given the study heterogeneity and breadth of topics, a narrative synthesis approach was used to collate and summarise the literature, including a count of study characteristics. Articles were categorised by study topic, with some studies covering more than one category. The study categories were then grouped into broader thematic groups, based on our interpretation of the categories. No assessment of study quality was made, as this was a mapping review.

## Findings

After deduplication, searches identified 18,588 articles published 2011-2024, of which 661 met inclusion criteria. The majority (72%) were from the USA, 12% Canada and the remaining 16% from four European countries, South Korea and New Zealand. The average annual number of relevant publications was 51 with a peak in 2020 (90 articles). As the overall number of studies in the review is high, the narrative below includes only selected references. Complete lists, by category, are provided in the supplementary material. An adapted PRISMA diagram is presented in Figure 1.<sup>30</sup>

## Figure 1. (PRISMA diagram)

### *Topics studied using information from MDS*

Overall, one of the most common uses of MDSs in this review was to describe residents, either in epidemiological terms, as described below, or in terms of their health, functioning and service use. This review includes studies that have considered individual resident functioning (e.g. mobility, incontinence), health conditions and symptoms (e.g. depression, pain), health care in the home (e.g. prescribing, end of life care), hospital attendances and admissions, transitions to and from care homes, quality of care and system-wide issues. Information from MDSs has been particularly useful when employed in empirical studies, providing a sampling frame and baseline for randomised controlled trials or other intervention studies.<sup>31-33</sup> Many studies have used MDS data linked to other sources of information, most commonly routine data sets such as those collected by Medicare. This provides a comprehensive picture of the resident's care as they transit across settings. It also enables assessment of outcomes that may be important to residents in their daily lives (e.g. activities of daily living), but may not be the intended primary outcome for medical care.

### **Table 1 Study topics**

#### Health conditions

MDSs can support investigation of the epidemiology, care and outcomes for specific health conditions amongst residents, despite not being healthcare records. Dementia and cognitive impairment are amongst the most commonly studied conditions in this regard. Mental health has also been an important area of study,<sup>34</sup> particularly the treatment of depression<sup>35</sup> and anxiety.<sup>36</sup> Prediction, prevention and treatment of infections are also feasible applications of MDSs. For

example, studies have looked at trends in infections over time,<sup>37</sup> risk factors for developing pneumonia,<sup>38</sup> evaluation<sup>39</sup> and use<sup>40</sup> of vaccines. MDSs have been used to investigate specific infections that have serious consequences for older adult residents, such as clostridium difficile,<sup>41</sup> norovirus<sup>42</sup> or methicillin resistant staphylococcus aureus.<sup>43</sup>

## Medications

Analysis of medications prescribed in care homes was the most common application of data from MDS in this review. De-prescribing or de-intensification of treatment was the explicit focus of a modest number of studies.<sup>44-53</sup> Research also examined specific categories of medications with known potential adverse effects for older adults, such as those with a high anticholinergic burden,<sup>54-61</sup> anticoagulants,<sup>62-68</sup> antidepressants,<sup>69-80</sup> anti-psychotics,<sup>31 36 44 70 77 78 81-107</sup> or statins.<sup>49-51 108-112</sup> Analysis of prescribing in some medication categories - antibiotics<sup>113-116</sup> or benzodiazepines,<sup>84 117</sup> for example, may be used to make broader assumptions about quality of care. A common approach in MDS-based research has been to consider medications as risk factors for adverse events in care homes. These have included, for example, falls,<sup>47 70 96 118</sup> fractures,<sup>73 101 119-121</sup> frailty<sup>122</sup> and death.<sup>57 69 90 92 94 104 123</sup>

## Pain

Assessment and prevalence of pain have been extensively studied using MDSs,<sup>124 125</sup> along with pharmacological management.<sup>126 127</sup> Authors have also explored factors associated with pain, including cognitive impairment<sup>128</sup> and dementia, and the consequences for behaviour within the home.<sup>129-131</sup>

## Assessment of functional status or decline

The ability of an older adult to perform day to day tasks, such as washing and dressing, and their mobility, have important implications in care homes. ADLs are available from MDS, but seldom recorded in healthcare records. Researchers have used MDS to explore changes in functional ability over time,<sup>132-135</sup> after acute medical and surgical hospital admissions,<sup>136 137 138 139</sup> and for residents who are ultimately discharged home with<sup>140</sup> or without restorative (rehabilitative) care.<sup>137</sup>

## Falls

Falls are recorded in care homes across the world as a measure of care quality and safety, and often as a regulatory requirement. Falls data from MDS have been used to characterise the scale and consequences,<sup>141-143</sup> and identify potential risk factors for falls, including functional ability,<sup>118</sup> health

status<sup>144 145</sup> and a range of medications.<sup>47 70 96 146</sup> Information on falls has also been analysed as part of wider research studies<sup>147 148</sup> and supplemented with data from healthcare records.<sup>149</sup>

## COVID-19

The coronavirus pandemic had broad ranging consequences for staff and resident health and wellbeing, as well as the organisation, delivery, regulation and scrutiny of care. This is reflected in the analyses of MDS, though the number of studies with a particular focus on COVID-19 was modest.<sup>150-156</sup>

## Hospital admissions

Across the world health systems strive to ensure that admissions to hospital from care homes only occur if appropriate and unavoidable. MDSs have been a common source of information for research on admissions<sup>157 158</sup> and readmissions. Individual and institutional factors associated with admissions have been studied, including mental and physical health,<sup>159 160</sup> functioning,<sup>161</sup> race,<sup>162</sup> payer status, quality of care in the home,<sup>163</sup> and ownership status of the care home.<sup>164</sup>

## Neglected topics

There are a number of topics, such as incontinence, oral health, that are important to residents and staff in care homes, but often neglected by research. We found a small number of studies concerned with the management or sequelae of incontinence,<sup>165-183</sup> but few with a specific focus on faecal incontinence.<sup>170 174 177</sup> In this review, a majority of the identified papers on dental or oral health were excluded because they focused on validating measures, rather than analysing data collected within an MDS. Those that were included all used the MDS RAI oral/dental items.<sup>184 32</sup>

## ***Measures and items***

Almost all studies in this review utilised MDS 3.0 (or preceding versions) or RAI and its versions. Hence, the majority of measures in this review were drawn from these well-established tools.

## Quality of Life

There is widespread acknowledgement of the importance of resident-level quality of life (QoL) in care homes. QoL as it reflects the quality, safety and effectiveness of care from the resident's perspective ('care-related quality of life') is important, but also residents' health-related and condition-specific QoL. However, the importance of the topic does not appear to be reflected in the



breadth of published papers using routinely collected data to investigate QoL. This may be partly due to the availability of QoL data from established MDS. InterRai's quality of life survey contains 49 items, but they are self-reported, and they may be liable to poor completion. Other domains of QoL that are important to residents and reflect the quality of care, e.g. interpersonal relationships may be difficult to capture.<sup>185</sup> Some of the dimensions that have been labelled as QoL could also be appropriately considered to be basic needs – e.g. safety and security, food, comfort, access to services. The lack of clarity over the measurement of QoL is also exemplified in another study, which measured changes in functional status, weight and depressive symptoms, and termed them QoL outcomes.<sup>152</sup> Measures of resident-level QoL (e.g. the Minnesota Quality of Life Survey) have been implemented in care homes in some geographical locations, but this has been to supplement collection of information for MDS, and compare to different MDS components.<sup>186 187</sup> Such localised data collections have enabled studies that examine the association between individual and institutional factors and QoL over time.<sup>188</sup>

## Discussion

This review has demonstrated the potential of MDSs to contribute to enhancing care and outcomes for care home residents through research. The research application of data from care home MDSs is broad. Key categories studied were description of resident status (e.g. functional assessment), symptoms (e.g. pain), service use (e.g. general and care of specific diagnoses or points in the life course), prescribing and quality of care. A wide range of measures were used, but the majority reflected the content of contemporary, implemented MDS.

The value and application of MDSs is increased by linking to other sources of routine information. In this review, many of the studies analysing MDSs linked to health service datasets. Such enlarged data sources support scrutiny of transitions across settings, evaluation of outcomes of care or generation of an in-depth picture of care delivery. Data linkage may also be helpful to identify care home residents in other routine data sources. This is an ongoing challenge in many countries, that inhibits basic study of care home resident health and social care utilisation and patterns of mortality.<sup>189 190</sup>

There are notable gaps in the published MDS research on issues that are important to residents and families, such as QoL, incontinence and oral health. There is an emerging focus and consensus on measurement of QoL in this setting, which could inform the future addition of QoL measures, especially for research purposes. Common metrics across datasets and studies would support

comparative research and may act as a stimulus for intervention development. Previous studies have taken a broad interpretation of the term 'QoL', which may be useful, but often leads to imprecision in what is being measured and a diversity of QoL measures used. Future MDS research ought to carefully consider the construct of interest (e.g. care-related, health-related or condition-specific QoL), as well as the study's specific aims and objectives and the emerging consensus (add DACHA refs), to guide the selection of QoL measure(s) for their analysis.

### **Comparison with other work**

A previous review of measurement tools designed for the management and care of older people in long term care identified 25 instruments. Similar to our study, a majority were drawn from MDS and RAI-MDS. Depression, cognition and functional capacity were the most commonly assessed domains.<sup>191</sup> Our review was broader because it included measures used in published research studies, some of which were developed in different settings. A common finding from both reviews is the clear potential of MDS to make a significant contribution beyond research, to the practical aspects of care home life.<sup>192</sup> The role of MDS in quality improvement activities has been well documented. Previous work showed that the Resident Assessment Instrument has been employed most often in the development of process improvement models, and in multi-faceted approaches and educational interventions to improve the quality of care.<sup>193</sup> The absence of any measurable impact was attributed to a paucity of staff and time, and turnover of personnel. End of life care is one of the most important aspects of care home work, but one that presents particular challenges to the measurement of quality. Eleven measures used in long term care settings to assess the quality of care when a resident is dying were identified by van Soest-Poortvliet and colleagues.<sup>194</sup> Key areas covered by the 11 instruments (340 items) were structure, process and evaluation of care (42%) and the quality of dying (38%). Most measures (7/11) encompassed multiple constructs, but it is noteworthy that the two developed outside of North America placed far less emphasis on measuring processes of care. A recent review of outcome measures from intervention research with care homes found similar gaps in under-studied areas, such as incontinence, but more studies on health-related QoL.<sup>195</sup> This latter may be explained by our focus on studies that analysed routinely collected data, rather than those that validated or tested QoL measures.

Our review focused on the content of MDS, and how the data may be applied to resident care and outcomes. Analyses of large datasets may be criticized as insensitive to resident experiences and perceptions. The US MDS 3.0 strives to overcome this by requiring care homes to interview residents with scripted questions to assess pain, mood and cognitive functioning. In practice, although a high

proportion of long stay residents do participate, people in smaller homes and those with cognitive impairment or in the last six months of life are less likely to have their voices heard.<sup>196</sup>

### **Strengths and limitations**

This is a novel review of the content and use of care home MDS data. Mapping of items and measures used in research on different topics can inform the development of future MDS. The review has also generated a resource for researchers, by highlighting the possible uses of MDS data, and areas where research is limited, including due to absence of data collection (e.g. QoL). However, it should be acknowledged that a review of this size is prone to errors and omissions. We excluded studies that used MDS derived items or measures to collect data, or implemented MDS in a research context. This gave prominence to studies from the USA and Canada where MDS are well established. Financial incentives and federally mandated data collection in the USA are a key concern. In other countries, statutes and regulations have a role in implementing standardised assessments,<sup>197</sup> and it is important to consider the local context when drawing conclusions from cross national studies. A number of European studies have made a major contribution to our understanding of the feasibility and potential of MDS. Notably, the Services and Health for Elderly in Long TERM care study (SHELTER) assessed the validity of InterRAI in seven European Union countries and Israel.<sup>198</sup> This research generated findings across a range of topic areas including prescribing, sensory impairment, prognostication and sleep.<sup>100 198-216 205 217 218</sup> In Italy the ULISSE study involved 31 nursing homes in a study of the quality of care delivered to older people, using InterRAI based assessments.<sup>219-222</sup> Whilst excluding these and other research initiatives from our review may limit the generalisability of our findings, it allows us to answer questions about what can be achieved with MDS data collected in a real-world context, without research staff input.

### **Implications and conclusions**

MDS are an invaluable source of longitudinal data on care home residents, generating unique insights into health, wellbeing and functional status. For researchers there are two scenarios where MDS are particularly useful. First, when linked to other datasets, MDSs provide a powerful resource for investigation of factors that may be associated with positive and adverse outcomes, including transfer to hospital and mortality. The range of factors that can be investigated is vast, ranging from funding models to institutional and individual characteristics. However, availability of such rich data within the MDS makes it critically important that researchers ensure that they have a robust hypothesis or rationale for their analyses. Second, MDSs can contribute to empirical studies involving primary data collection. Generating baseline data from an MDS, or providing a comparison

group for an intervention study helps to keep research costs down by reducing the work of data collection. Modern analytical techniques combined with MDSs offer exciting possibilities to

There are some important gaps in the body of MDS research that should be addressed. QoL has often been conceptualised in terms of health and functioning, rather than potentially more holistic, social care related outcomes. In addition, where MDS use is established, there may be limited ability to modify or influence the data collected. Other apparent gaps – such as decline in functional status, sensory impairment and incontinence – point to a need for MDS based researchers to ensure their questions reflect the priorities of residents and those who care for them. This is important, because when MDS data does reflect the experience of care, data entry is improved, and the information can be used as a basis for care planning and review.<sup>223</sup>

**Table 1 Study topics in research using MDS\***

| TOPIC                              | SUB-CATEGORIES                       | NUMBER OF ARTICLES |
|------------------------------------|--------------------------------------|--------------------|
| <b>Epidemiology &amp; research</b> | Describing residents                 | 87                 |
|                                    | MDS as a supplement to primary study | 61                 |
|                                    | Research methods                     | 23                 |
|                                    | Mortality risk prediction            | 15                 |
|                                    | Prediction of other outcomes         | 32                 |
|                                    | Preventive approaches                | 75                 |
|                                    | Outcomes                             | 34                 |
| <b>System-wide issues</b>          | Care home admissions                 | 20                 |
|                                    | Care home bed use                    | 17                 |
|                                    | Hospital admissions & readmissions   | 40                 |
|                                    | Emergency department attendance      | 16                 |
|                                    | Post-acute care                      | 37                 |
|                                    | Staffing                             | 4                  |
|                                    | Trends                               | 12                 |
| <b>Quality</b>                     | Quality of care                      | 71                 |
|                                    | Quality of life                      | 13                 |
|                                    | Resident preferences                 | 5                  |
| <b>Disability and impairment</b>   | Functional assessment                | 53                 |
|                                    | Incontinence                         | 19                 |
|                                    | Falls                                | 32                 |
|                                    | Fracture prevention                  | 22                 |
| <b>Health</b>                      | Mental health                        | 16                 |
|                                    | Dementia                             | 87                 |
|                                    | Cognitive impairment                 | 26                 |
|                                    | Depression                           | 9                  |
|                                    | Delirium                             | 7                  |
|                                    | Frailty                              | 32                 |
|                                    | Obesity and nutrition                | 10                 |
|                                    | Multimorbidity                       | 5                  |
|                                    | Parkinson's                          | 3                  |
|                                    | Infections                           | 39                 |
| <b>Symptoms</b>                    | Pain                                 | 39                 |
| <b>Prescribed medications</b>      | Medication                           | 121                |
|                                    | Antidepressants                      | 12                 |
|                                    | Anticoagulants                       | 7                  |
|                                    | Anticholinergics                     | 8                  |
|                                    | Antibiotics                          | 12                 |
|                                    | Antipsychotics                       | 40                 |
|                                    | Anxiolytics                          | 4                  |
|                                    | Diabetes medications                 | 17                 |
|                                    | Deprescribing                        | 12                 |
| <b>End of life care</b>            | End of life care                     | 51                 |
|                                    | Advanced care planning               | 2                  |

- Numbers will not sum to total included articles, as many fall into more than one group,

## References

1. Gordon AL, Franklin M, Bradshaw L, et al. Health status of UK care home residents: a cohort study. *Age and ageing* 2014;43(1):97-103. doi: 10.1093/ageing/aft077 [published Online First: 2013/07/19]
2. Office for National Statistics. Changes in the Older Resident Care Home Population between 2001 and 2011. London: ONS, 2014.
3. Barker RO, Hanratty B, Kingston A, et al. Changes in health and functioning of care home residents over two decades: what can we learn from population-based studies? *Age and ageing* 2020 doi: 10.1093/ageing/afaa227 [published Online First: 2020/11/18]
4. ONS. National Population Projections: 2014-based Statistical Bulletin. London, 2015:1-19.
5. Wittenberg R, Comas-Herrera A, Pickard L, et al. Future demand for long-term care in the UK. York: Joseph Rowntree Foundation, 2004.
6. Martin F, Thorpe T, Heath H, et al. Quest for Quality. London: British Geriatrics Society, 2011.
7. Boyd M, Broad JB, Kerse N, et al. Twenty-Year Trends in Dependency in Residential Aged Care in Auckland, New Zealand: A Descriptive Study. *Journal of the American Medical Directors Association* 2011;12(7):535-40. doi: <http://dx.doi.org/10.1016/j.jamda.2011.01.014>
8. The changing role of care homes; 2011.
9. Lupp M, Luck T, Weyerer S, et al. Prediction of institutionalization in the elderly. A systematic review. *Age and ageing* 2010;39(1):31-8. doi: 10.1093/ageing/afp202 [published Online First: 2009/11/26]
10. Bowman C, Whistler J, Ellerby M. A national census of care home residents. *Age and ageing* 2004;33(6):561-6. doi: 10.1093/ageing/afh177 [published Online First: 2004/08/17]
11. Martin F, Thorpe T, Heath H, et al. Quest for quality: British Geriatrics Society joint working party inquiry into the quality of healthcare support for older people in care homes: A call for leadership, partnership and quality improvement. London: BGS, 2011.
12. Wysocki A, Thomas KS, Mor V. Functional Improvement Among Short-Stay Nursing Home Residents in the MDS 3.0. *Journal of the American Medical Directors Association* 2015;16:470-74. doi: 10.1016/j.jamda.2014.11.018
13. Werner RM, Konetzka RT, Kruse GB. Impact of public reporting on unreported quality of care. *Health Services Research* 2009;44:379-98. doi: 10.1111/j.1475-6773.2008.00915.x
14. Callahan CM, Arling G, Tu W, et al. Transitions in care for older adults with and without dementia. *Journal of the American Geriatrics Society* 2012;60:813-20. doi: 10.1111/j.1532-5415.2012.03905.x
15. MDS Version 3 [Available from: <https://www.cms.gov/Medicare/Quality-Initiatives-Patient-Assessment-Instruments/NursingHomeQualityInits/Downloads/MDS-30-RAI-Manual-V113.pdf>].
16. Morris JN, Fries BE, Frijters D, et al. interRAI home care quality indicators. *BMC Geriatrics* 2013;13:127-27. doi: 10.1186/1471-2318-13-127
17. Halfens RJG, Meesterberends E, van Nie-Visser NC, et al. International prevalence measurement of care problems: results. *Journal of Advanced Nursing* 2013;69(9):e5-e17. doi: 10.1111/jan.12189
18. Implementing the Resident Assessment Instrument: Case Studies of Policymaking for Long-Term Care in Eight Countries. Implementing the Resident Assessment Instrument: Case Studies of Policymaking for Long-Term Care in; 2003.
19. CAPHRI. LPZ Publications 2015 [2016].
20. Greenhalgh T, Robert G, McFarlane F, et al. Diffusion of Innovations in Service Organisations: Systematic Review and Recommendations. *The Milbank Quarterly* 2004;82 doi: 10.1111/j.0887-378X.2004.00325.x
21. Hoffmann F, Maas F, Rodrigues R, et al. Measuring Progress: Indicators for care homes. Vienna, Austria: European Centre for Social Welfare Policy and Research, 2010.

22. Comas-Herrera A MJ, Byrd W, Lorenz-Dant K, Patel D, Pharoah D LTCcovid International living report on COVID-19 and Long-Term Care. London: Care Policy & Evaluation Centre, London School of Economics and Political Science., 2022.
23. NECS NECSU. Capacity Tracker Insight for Care 2020 [Available from: <https://www.necsu.nhs.uk/capacity-tracker/>].
24. Campbell F, Tricco AC, Munn Z, et al. Mapping reviews, scoping reviews, and evidence and gap maps (EGMs): the same but different— the “Big Picture” review family.
25. Arksey H, O'Malley L. Scoping studies: towards a methodological framework. *International Journal of Social Research Methodology* 2005;8(1):19-32.
26. Levac D, Colquhoun H, O'Brien KK. Scoping studies: advancing the methodology. *Implement Sci* 2010;5:69. doi: 10.1186/1748-5908-5-69 [published Online First: 2010/09/22]
27. Colquhoun HL, Levac D, O'Brien KK, et al. Scoping reviews: time for clarity in definition, methods, and reporting. *J Clin Epidemiol* 2014;67(12):1291-4. doi: 10.1016/j.jclinepi.2014.03.013 [published Online First: 2014/07/19]
28. Peters MD, Godfrey CM, Khalil H, et al. Guidance for conducting systematic scoping reviews. *Int J Evid Based Healthc* 2015;13(3):141-6. doi: 10.1097/xeb.0000000000000050 [published Online First: 2015/07/03]
29. Kelly S, Cowan A, Akdur G, et al. Outcome measures from international older adult care home intervention research: a scoping review. *Age Ageing* 2023;52(5) doi: 10.1093/ageing/afad069
30. Tricco AC, Lillie E, Zarin W, et al. PRISMA Extension for Scoping Reviews (PRISMA-ScR): Checklist and Explanation. *Ann Intern Med* 2018;169(7):467-73. doi: 10.7326/m18-0850 [published Online First: 2018/09/05]
31. Hirdes JP, Major J, Didic S, et al. A Canadian Cohort Study to Evaluate the Outcomes Associated with a Multicenter Initiative to Reduce Antipsychotic Use in Long-Term Care Homes. *Journal of the American Medical Directors Association* 2020;21(6):817-22. doi: <https://dx.doi.org/10.1016/j.jamda.2020.04.004>
32. Weintraub JA, Zimmerman S, Ward K, et al. Improving Nursing Home Residents' Oral Hygiene: Results of a Cluster Randomized Intervention Trial. *Journal of the American Medical Directors Association* 2018;19(12):1086-91. doi: <https://dx.doi.org/10.1016/j.jamda.2018.09.036>
33. Gravenstein S, Davidson HE, Han LF, et al. Feasibility of a cluster-randomized influenza vaccination trial in U.S. nursing homes: Lessons learned. *Human vaccines & immunotherapeutics* 2018;14(3):736-43. doi: <https://dx.doi.org/10.1080/21645515.2017.1398872>
34. Rahman M, Grabowski DC, Intrator O, et al. Serious mental illness and nursing home quality of care. *Health services research* 2013;48(4):1279-98. doi: <https://dx.doi.org/10.1111/1475-6773.12023>
35. Siegel MJ, Lucas JA, Akincigil A, et al. Race, education, and the treatment of depression in nursing homes. *Journal of aging and health* 2012 24(5):752-78. doi: <https://dx.doi.org/10.1177/0898264311435548>
36. Biring P, Hjaltadottir I. [The prevalence of psychiatric diagnoses and psychotropic medication in icelandic nursing homes from 2003 to 2018]. *Laeknabladid* 2021;107(1):11-16. doi: <https://dx.doi.org/10.17992/ibl.2021.01.615>
37. Herzig CTA, Dick AW, Sorbero M, et al. Infection Trends in US Nursing Homes, 2006-2013. *Journal of the American Medical Directors Association* 2017;18(7):635.e9-35.e20. doi: <https://dx.doi.org/10.1016/j.jamda.2017.04.003>
38. Sloane PD, Zimmerman S, Ward K, et al. The Nursing Home Pneumonia Risk Index: A Simple, Valid MDS-Based Method of Identifying 6-Month Risk for Pneumonia and Mortality. *J Am Med Dir Assoc* 2017;18(9):810.e11-10.e14. doi: 10.1016/j.jamda.2017.06.008 [published Online First: 20170729]

39. Gravenstein S, Dahal R, Gozalo PL, et al. A cluster randomized controlled trial comparing relative effectiveness of two licensed influenza vaccines in US nursing homes: Design and rationale. *Clinical trials (London, England)* 2016;13(3):264-74. doi: <https://dx.doi.org/10.1177/1740774515625976>
40. Black CL, Williams WW, Arbeloa I, et al. Trends in Influenza and Pneumococcal Vaccination Among US Nursing Home Residents, 2006-2014. *Journal of the American Medical Directors Association* 2017;18(8):735.e1-35.e14. doi: <https://dx.doi.org/10.1016/j.jamda.2017.05.002>
41. Joyce NR, Mylonakis E, Mor V. Effect of Clostridium difficile Prevalence in Hospitals and Nursing Homes on Risk of Infection. *Journal of the American Geriatrics Society* 2017;65(7):1527-34. doi: <https://dx.doi.org/10.1111/jgs.14838>
42. Trivedi TK, DeSalvo T, Lee L, et al. Hospitalizations and mortality associated with norovirus outbreaks in nursing homes, 2009-2010. *JAMA* 2012;308(16):1668-75.
43. McDanel JS, Murphy CR, Diekema DJ, et al. Chlorhexidine and mupirocin susceptibilities of methicillin-resistant staphylococcus aureus from colonized nursing home residents. *Antimicrobial agents and chemotherapy* 2013;57(1):552-8. doi: <https://dx.doi.org/10.1128/AAC.01623-12>
44. Niznik JD, Zhao X, He M, et al. Impact of deprescribing AChEIs on aggressive behaviors and antipsychotic prescribing. *Alzheimer's & dementia : the journal of the Alzheimer's Association* 2020;16(4):630-40. doi: <https://dx.doi.org/10.1002/alz.12054>
45. Niznik JD, Zhao X, He M, et al. Risk for Health Events After Deprescribing Acetylcholinesterase Inhibitors in Nursing Home Residents With Severe Dementia. *Journal of the American Geriatrics Society* 2020;68(4):699-707. doi: <https://dx.doi.org/10.1111/jgs.16241>
46. Niznik JD, Hunnicutt JN, Zhao X, et al. Deintensification of Diabetes Medications among Veterans at the End of Life in VA Nursing Homes. *Journal of the American Geriatrics Society* 2020;68(4):736-45. doi: <https://dx.doi.org/10.1111/jgs.16360>
47. Song W, Intrator O, Lee S, et al. Antihypertensive Drug Deintensification and Recurrent Falls in Long-Term Care. *Health services research* 2018;53(6):4066-86. doi: <https://dx.doi.org/10.1111/1475-6773.13074>
48. Tamura BK, Bell CL, Lubimir K, et al. Physician intervention for medication reduction in a nursing home: the polypharmacy outcomes project. *Journal of the American Medical Directors Association* 2011;12(5):326-30. doi: <https://dx.doi.org/10.1016/j.jamda.2010.08.013>
49. Mack DS, Baek J, Tjia J, et al. Statin Discontinuation and Life-Limiting Illness in Non-Skilled Stay Nursing Homes at Admission. *Journal of the American Geriatrics Society* 2020;68(12):2787-96. doi: <https://dx.doi.org/10.1111/jgs.16777>
50. Tjia J, Cutrona SL, Peterson D, et al. Statin discontinuation in nursing home residents with advanced dementia. *J Am Geriatr Soc* 2014;62(11):2095-101. doi: 10.1111/jgs.13105 [published Online First: 20141104]
51. Thorpe CT, Sileanu FE, Mor MK, et al. Discontinuation of Statins in Veterans Admitted to Nursing Homes near the End of Life. *Journal of the American Geriatrics Society* 2020;68(11):2609-19. doi: <https://dx.doi.org/10.1111/jgs.16727>
52. MacLagan LC, Bronskill SE, Guan J, et al. Predictors of Cholinesterase Discontinuation during the First Year after Nursing Home Admission. *J Am Med Dir Assoc* 2018;19(11):959-66.e4. doi: 10.1016/j.jamda.2018.07.020 [published Online First: 20180924]
53. Linsky A, Hermos JA, Lawler EV, et al. Proton pump inhibitor discontinuation in long-term care. *Journal of the American Geriatrics Society* 2011;59(9):1658-64. doi: <https://dx.doi.org/10.1111/j.1532-5415.2011.03545.x>
54. Chatterjee S, Bali V, Carnahan RM, et al. Anticholinergic burden and risk of cognitive impairment in elderly nursing home residents with depression. *Research in social & administrative pharmacy : RSAP* 2020 16(3):329-35. doi: <https://dx.doi.org/10.1016/j.sapharm.2019.05.020>



55. Wouters H, Hilmer SN, Twisk J, et al. Drug Burden Index and Cognitive and Physical Function in Aged Care Residents: A Longitudinal Study. *Journal of the American Medical Directors Association* 2020;21(8):1086-92.e1. doi: <https://dx.doi.org/10.1016/j.jamda.2020.05.037>
56. Malagaris I, Mehta HB, Li S, et al. Decrease of Anticholinergic Drug Use in Nursing Home Residents in the United States, 2009 to 2017. *Journal of the American Geriatrics Society* 2020;68(12):2797-804. doi: <https://dx.doi.org/10.1111/jgs.16776>
57. Chatterjee S, Bali V, Carnahan RM, et al. Risk of Mortality Associated with Anticholinergic Use in Elderly Nursing Home Residents with Depression. *Drugs & aging* 2017 34(9):691-700. doi: <https://dx.doi.org/10.1007/s40266-017-0475-5>
58. Niznik J, Zhao X, Jiang T, et al. Anticholinergic Prescribing in Medicare Part D Beneficiaries Residing in Nursing Homes: Results from a Retrospective Cross-Sectional Analysis of Medicare Data. *Drugs & aging* 2017;34(12):925-39. doi: <https://dx.doi.org/10.1007/s40266-017-0502-6>
59. Chatterjee S, Bali V, Carnahan RM, et al. Anticholinergic Medication Use and Risk of Fracture in Elderly Adults with Depression. *Journal of the American Geriatrics Society* 2016 64(7):1492-7. doi: <https://dx.doi.org/10.1111/jgs.14182>
60. Vetrano DL, La Carpia D, Grande G, et al. Anticholinergic Medication Burden and 5-Year Risk of Hospitalization and Death in Nursing Home Elderly Residents With Coronary Artery Disease. *Journal of the American Medical Directors Association* 2016;17(11):1056-59. doi: <https://dx.doi.org/10.1016/j.jamda.2016.07.012>
61. Landi F, Dell'Aquila G, Collamati A, et al. Anticholinergic drug use and negative outcomes among the frail elderly population living in a nursing home. *Journal of the American Medical Directors Association* 2014;15(11):825-9. doi: <https://dx.doi.org/10.1016/j.jamda.2014.08.002>
62. Zhang N, Patel J, Chen Z, et al. Geriatric Conditions Are Associated With Decreased Anticoagulation Use in Long-Term Care Residents With Atrial Fibrillation. *J Am Heart Assoc* 2021;10(16):e021293. doi: 10.1161/jaha.121.021293 [published Online First: 20210813]
63. Chen Q, Lapane K, Nunes AP, et al. Prevalence and the factors associated with oral anticoagulant use among nursing home residents. *J Clin Pharm Ther* 2021;46(6):1714-28. doi: 10.1111/jcpt.13508 [published Online First: 20210831]
64. Alcusky M, Baek J, Tjia J, et al. Geographic Variation in Anticoagulant Use and Resident, Nursing Home, and County Characteristics Associated With Treatment Among US Nursing Home Residents. *Journal of the American Medical Directors Association* 2021;22(1):164-72.e9. doi: <https://dx.doi.org/10.1016/j.jamda.2020.10.001>
65. Kapoor A, Foley G, Zhang N, et al. Geriatric Conditions Predict Discontinuation of Anticoagulation in Long-Term Care Residents With Atrial Fibrillation. *Journal of the American Geriatrics Society* 2020;68(4):717-24. doi: <https://dx.doi.org/10.1111/jgs.16335>
66. Alcusky M, McManus DD, Hume AL, et al. Changes in Anticoagulant Utilization Among United States Nursing Home Residents With Atrial Fibrillation From 2011 to 2016. *Journal of the American Heart Association* 2019;8(9):e012023. doi: <https://dx.doi.org/10.1161/JAHA.119.012023>
67. Reardon G, Pandya N, Nutescu EA, et al. Use of warfarin therapy among residents who developed venous thromboembolism in the nursing home. *The American journal of geriatric pharmacotherapy* 2012;10(6):361-72. doi: <https://dx.doi.org/10.1016/j.amjopharm.2012.11.003>
68. Meyers JL, Davis KL, Yu YF. Stroke and transient ischemic attack in the long-term care setting: patient characteristics, medication treatment, and length of stay. *The Consultant pharmacist : the journal of the American Society of Consultant Pharmacists* 2011;26(3):170-81. doi: <https://dx.doi.org/10.4140/TCP.n.2011.170>

69. Bali V, Chatterjee S, Johnson ML, et al. Risk of Mortality in Elderly Nursing Home Patients with Depression Using Paroxetine. *Pharmacotherapy* 2017 37(3):287-96. doi: <https://dx.doi.org/10.1002/phar.1898>
70. Wei YJ, Simoni-Wastila L, Lucas JA, et al. Fall and Fracture Risk in Nursing Home Residents With Moderate-to-Severe Behavioral Symptoms of Alzheimer's Disease and Related Dementias Initiating Antidepressants or Antipsychotics. *J Gerontol A Biol Sci Med Sci* 2017;72(5):695-702. doi: 10.1093/gerona/glw095
71. Bali V, Johnson ML, Chen H, et al. Comparative Cognitive Profile of Second-Generation Antidepressants in Elderly Nursing Home Residents With Depression. *The Annals of pharmacotherapy* 2016 50(2):96-105. doi: <https://dx.doi.org/10.1177/1060028015618978>
72. Bali V, Holmes HM, Johnson ML, et al. Comparative Effectiveness of Second-Generation Antidepressants in Reducing the Risk of Dementia in Elderly Nursing Home Residents with Depression. *Pharmacotherapy* 2016 36(1):38-48. doi: <https://dx.doi.org/10.1002/phar.1680>
73. Bali V, Chatterjee S, Johnson ML, et al. Comparative risk of hip fractures in elderly nursing home patients with depression using paroxetine and other selective serotonin reuptake inhibitors. *Journal of comparative effectiveness research* 2016 5(5):461-73. doi: <https://dx.doi.org/10.2217/cer-2016-0009>
74. Bali V, Chatterjee S, Johnson ML, et al. Risk of Cognitive Decline Associated With Paroxetine Use in Elderly Nursing Home Patients With Depression. *American journal of Alzheimer's disease and other dementias* 2016 31(8):678-86.
75. Luo H, Tang JY, Wong GH, et al. The Effect of Depressive Symptoms and Antidepressant Use on Subsequent Physical Decline and Number of Hospitalizations in Nursing Home Residents: A 9-Year Longitudinal Study. *J Am Med Dir Assoc* 2015;16(12):1048-54. doi: 10.1016/j.jamda.2015.06.016 [published Online First: 20150731]
76. Bali V, Chatterjee S, Carnahan RM, et al. Risk of Dementia Among Elderly Nursing Home Patients Using Paroxetine and Other Selective Serotonin Reuptake Inhibitors. *Psychiatric services (Washington, DC)* 2015;66(12):1333-40. doi: <https://dx.doi.org/10.1176/appi.ps.201500011>
77. Wei YJ, Simoni-Wastila L, Zuckerman IH, et al. Quality of psychopharmacological medication prescribing and mortality in Medicare beneficiaries in nursing homes. *J Am Geriatr Soc* 2014;62(8):1490-504. doi: 10.1111/jgs.12939 [published Online First: 20140715]
78. Stevenson DG, O'Malley AJ, Dusetzina SB, et al. Effect of Part D coverage restrictions for antidepressants, antipsychotics, and cholinesterase inhibitors on related nursing home resident outcomes. *Journal of the American Geriatrics Society* 2014;62(9):1666-74. doi: <https://dx.doi.org/10.1111/jgs.12988>
79. Shah S, Schoenbachler B, Streim J, et al. Antidepressant prescribing patterns in the nursing home: second-generation issues revisited. *Journal of the American Medical Directors Association* 2012;13(4):406.e13-8. doi: <https://dx.doi.org/10.1016/j.jamda.2011.09.004>
80. Gaboda D, Lucas J, Siegel M, et al. No longer undertreated? Depression diagnosis and antidepressant therapy in elderly long-stay nursing home residents, 1999 to 2007. *Journal of the American Geriatrics Society* 2011 59(4):673-80. doi: <https://dx.doi.org/10.1111/j.1532-5415.2011.03322.x>
81. Chekani F, Holmes HM, Johnson ML, et al. Use of Atypical Antipsychotics in Long-Term Care Residents with Parkinson's Disease and Comorbid Depression. *Drug, healthcare and patient safety* 2020 12:23-30. doi: <https://dx.doi.org/10.2147/DHPS.S226486>
82. Walker K, Shearkhani S, Bai YQ, et al. The Impact of the Long-term Care Homes Act and Public Reporting on Physical Restraint and Potentially Inappropriate Antipsychotic Use in Ontario's Long-term Care Homes. *The journals of gerontology Series A, Biological sciences and medical sciences* 2020;75(4):813-19. doi: <https://dx.doi.org/10.1093/gerona/glz143>
83. Roberts AR, Smith AC, Bowlblis JR. Nursing Home Social Services and Post-Acute Care: Does More Qualified Staff Improve Behavioral Symptoms and Reduce Antipsychotic Drug Use? *Journal*

- of the American Medical Directors Association 2020;21(3):388-94. doi: <https://dx.doi.org/10.1016/j.jamda.2019.07.024>
84. MacLagan LC, Maxwell CJ, Harris DA, et al. Sex Differences in Antipsychotic and Benzodiazepine Prescribing Patterns: A Cohort Study of Newly Admitted Nursing Home Residents with Dementia in Ontario, Canada. *Drugs Aging* 2020;37(11):817-27. doi: 10.1007/s40266-020-00799-2 [published Online First: 20200926]
  85. Briesacher BA, Mui B, Devlin JW, et al. Nursing homes underreport antipsychotic prescribing. *Aging & mental health* 2020;24(4):668-72. doi: <https://dx.doi.org/10.1080/13607863.2019.1571015>
  86. Zhang Y, Letuchy EM, Carnahan RM. Where Are Antipsychotics Prescribed in Nursing Homes Initiated? *Journal of the American Geriatrics Society* 2018;66(6):1082-88. doi: <https://dx.doi.org/10.1111/jgs.15223>
  87. Phillips LJ, Birtley NM, Petroski GF, et al. An observational study of antipsychotic medication use among long-stay nursing home residents without qualifying diagnoses. *Journal of psychiatric and mental health nursing* 2018;25(8):463-74. doi: <https://dx.doi.org/10.1111/jpm.12488>
  88. Jester DJ, Hyer K, Molinari V, et al. Age-dependent determinants of antipsychotic use among newly admitted residents of skilled nursing facilities: A population-based study. *International journal of geriatric psychiatry* 2018;33(10):1370-82. doi: <https://dx.doi.org/10.1002/gps.4934>
  89. Carnahan RM, Letuchy EM. Bipolar Disorder in Nursing Homes: Impact on Antipsychotic Use, Diagnosis Patterns, and New Diagnoses in People with Dementia. *The American journal of geriatric psychiatry : official journal of the American Association for Geriatric Psychiatry* 2018;26(1):2-10. doi: <https://dx.doi.org/10.1016/j.jagp.2017.09.007>
  90. Liperoti R, Sganga F, Landi F, et al. Antipsychotic Drug Interactions and Mortality Among Nursing Home Residents With Cognitive Impairment. *J Clin Psychiatry* 2017;78(1):e76-e82. doi: 10.4088/JCP.15m10303
  91. Heckman GA, Crizzle AM, Chen J, et al. Clinical Complexity and Use of Antipsychotics and Restraints in Long-Term Care Residents with Parkinson's Disease. *Journal of Parkinson's disease* 2017;7(1):103-15. doi: <https://dx.doi.org/10.3233/JPD-160931>
  92. Simoni-Wastila L, Wei Y-J, Lucas JA, et al. Mortality Risk of Antipsychotic Dose and Duration in Nursing Home Residents with Chronic or Acute Indications. *Journal of the American Geriatrics Society* 2016;64(5):973-80. doi: <https://dx.doi.org/10.1111/jgs.14111>
  93. Gordon SE, Dufour AB, Monti SM, et al. Impact of a Videoconference Educational Intervention on Physical Restraint and Antipsychotic Use in Nursing Homes: Results From the ECHO-AGE Pilot Study. *J Am Med Dir Assoc* 2016;17(6):553-6. doi: 10.1016/j.jamda.2016.03.002 [published Online First: 20160506]
  94. Park Y, Franklin JM, Schneeweiss S, et al. Antipsychotics and mortality: adjusting for mortality risk scores to address confounding by terminal illness. *Journal of the American Geriatrics Society* 2015;63(3):516-23. doi: <https://dx.doi.org/10.1111/jgs.13326>
  95. Foebel A, Balloková A, Wellens NIH, et al. A retrospective, longitudinal study of factors associated with new antipsychotic medication use among recently admitted long-term care residents. *BMC geriatrics* 2015;15:128. doi: <https://dx.doi.org/10.1186/s12877-015-0127-8>
  96. Bozat-Emre S, Doupe M, Kozyskyj AL, et al. Atypical antipsychotic drug use and falls among nursing home residents in Winnipeg, Canada. *International journal of geriatric psychiatry* 2015;30(8):842-50. doi: <https://dx.doi.org/10.1002/gps.4223>
  97. Tjia J, Field T, Lemay C, et al. Antipsychotic use in nursing homes varies by psychiatric consultant. *Med Care* 2014;52(3):267-71. doi: 10.1097/mlr.0000000000000076
  98. Simoni-Wastila L, Wei YJ, Luong M, et al. Quality of psychopharmacological medication use in nursing home residents. *Res Social Adm Pharm* 2014;10(3):494-507. doi: 10.1016/j.sapharm.2013.10.003 [published Online First: 20131115]

99. Huybrechts KF, Gerhard T, Franklin JM, et al. Instrumental variable applications using nursing home prescribing preferences in comparative effectiveness research. *Pharmacoepidemiology and drug safety* 2014;23(8):830-8. doi: <https://dx.doi.org/10.1002/pds.3611>
100. Foebel AD, Liperoti R, Onder G, et al. Use of antipsychotic drugs among residents with dementia in European long-term care facilities: results from the SHELTER study. *J Am Med Dir Assoc* 2014;15(12):911-7. doi: 10.1016/j.jamda.2014.07.012 [published Online First: 20140924]
101. Rigler SK, Shireman TI, Cook-Wiens GJ, et al. Fracture risk in nursing home residents initiating antipsychotic medications. *Journal of the American Geriatrics Society* 2013;61(5):715-22. doi: <https://dx.doi.org/10.1111/jgs.12216>
102. Huybrechts KF, Schneeweiss S, Gerhard T, et al. Comparative safety of antipsychotic medications in nursing home residents. *Journal of the American Geriatrics Society* 2012;60(3):420-9. doi: <https://dx.doi.org/10.1111/j.1532-5415.2011.03853.x>
103. Huybrechts KF, Rothman KJ, Brookhart MA, et al. Variation in antipsychotic treatment choice across US nursing homes. *Journal of clinical psychopharmacology* 2012;32(1):11-7. doi: <https://dx.doi.org/10.1097/JCP.0b013e31823f6f46>
104. Huybrechts KF, Gerhard T, Crystal S, et al. Differential risk of death in older residents in nursing homes prescribed specific antipsychotic drugs: population based cohort study. *BMJ (Clinical research ed)* 2012;344:e977. doi: <https://dx.doi.org/10.1136/bmj.e977>
105. Gellad WF, Aspinall SL, Handler SM, et al. Use of antipsychotics among older residents in VA nursing homes. *Medical care* 2012;50(11):954-60. doi: <https://dx.doi.org/10.1097/MLR.0b013e31825fb21d>
106. Lustenberger I, Schüpbach B, von Gunten A, et al. Psychotropic medication use in Swiss nursing homes. *Swiss Med Wkly* 2011;141:w13254. doi: 10.4414/smw.2011.13254 [published Online First: 20111004]
107. Jalbert JJ, Daiello LA, Eaton CB, et al. Antipsychotic use and the risk of diabetes in nursing home residents with dementia. *The American journal of geriatric pharmacotherapy* 2011;9(3):153-63. doi: <https://dx.doi.org/10.1016/j.amjopharm.2011.04.006>
108. Mack DS, Baek J, Tjia J, et al. Geographic Variation of Statin Use Among US Nursing Home Residents With Life-limiting Illness. *Med Care* 2021;59(5):425-36. doi: 10.1097/mlr.0000000000001505
109. Zullo AR, Ofori-Asenso R, Wood M, et al. Effects of Statins for Secondary Prevention on Functioning and Other Outcomes Among Nursing Home Residents. *Journal of the American Medical Directors Association* 2020;21(4):500-07.e8. doi: <https://dx.doi.org/10.1016/j.jamda.2020.01.102>
110. Zullo AR, Mogul A, Corsi K, et al. Association Between Secondary Prevention Medication Use and Outcomes in Frail Older Adults After Acute Myocardial Infarction. *Circulation Cardiovascular quality and outcomes* 2019;12(4):e004942. doi: <https://dx.doi.org/10.1161/CIRCOUTCOMES.118.004942>
111. Zullo AR, Sharmin S, Lee Y, et al. Secondary Prevention Medication Use After Myocardial Infarction in U.S. Nursing Home Residents. *Journal of the American Geriatrics Society* 2017;65(11):2397-404. doi: <https://dx.doi.org/10.1111/jgs.15144>
112. Dybiczb SB, Thompson S, Molotsky S, et al. Prevalence of diabetes and the burden of comorbid conditions among elderly nursing home residents. *The American journal of geriatric pharmacotherapy* 2011;9(4):212-23. doi: <https://dx.doi.org/10.1016/j.amjopharm.2011.05.001>
113. Silva JBB, Riester MR, Zullo AR. Antibiotic Prescribing Patterns for Urinary Tract Infections and Pneumonia by Prescriber Type and Specialty in Nursing Home Care, 2016-2018. *J Am Med Dir Assoc* 2024;25(5):769-73.e9. doi: 10.1016/j.jamda.2024.01.019 [published Online First: 20240227]

114. Cohen CC, Dick AW, Agarwal M, et al. Trends in antibiotics use among long-term US nursing-home residents. *Infection control and hospital epidemiology* 2020;1-7. doi: <https://dx.doi.org/10.1017/ice.2020.422>
115. Saxena FE, Bronskill SE, Brown KA, et al. The Association of Resident Communication Abilities and Antibiotic Use in Long-Term Care. *Journal of the American Geriatrics Society* 2019;67(6):1164-73.
116. Rummukainen M-L, Makela M, Noro A, et al. Assessing prevalence of antimicrobial use and infections using the minimal data set in Finnish long-term care facilities. *American journal of infection control* 2013;41(4):e35-7. doi: <https://dx.doi.org/10.1016/j.ajic.2012.09.007>
117. Malagaris I, Mehta HB, Goodwin JS. Trends and variation in benzodiazepine use in nursing homes in the USA. *Eur J Clin Pharmacol* 2022;78(3):489-96. doi: 10.1007/s00228-021-03244-4 [published Online First: 20211102]
118. Boyce RD, Kravchenko OV, Perera S, et al. Falls prediction using the nursing home minimum dataset. *J Am Med Inform Assoc* 2022;29(9):1497-507. doi: 10.1093/jamia/ocac111
119. Zullo AR, Sorial MN, Lee Y, et al. Predictors of Hip Fracture Despite Treatment with Bisphosphonates among Frail Older Adults. *Journal of the American Geriatrics Society* 2020;68(2):256-60. doi: <https://dx.doi.org/10.1111/jgs.16176>
120. Zullo AR, Zhang T, Lee Y, et al. Effect of Bisphosphonates on Fracture Outcomes Among Frail Older Adults. *Journal of the American Geriatrics Society* 2019;67(4):768-76. doi: <https://dx.doi.org/10.1111/jgs.15725>
121. Dore DD, Zullo AR, Mor V, et al. Age, Sex, and Dose Effects of Nonbenzodiazepine Hypnotics on Hip Fracture in Nursing Home Residents. *Journal of the American Medical Directors Association* 2018;19(4):328-32.e2. doi: <https://dx.doi.org/10.1016/j.jamda.2017.09.015>
122. Yuan Y, Lapane KL, Tjia J, et al. Physical Frailty and Cognitive Impairment in Older Adults in United States Nursing Homes. *Dement Geriatr Cogn Disord* 2021;50(1):60-67. doi: 10.1159/000515140 [published Online First: 20210422]
123. Steinman MA, Zullo AR, Lee Y, et al. Association of  $\beta$ -Blockers With Functional Outcomes, Death, and Rehospitalization in Older Nursing Home Residents After Acute Myocardial Infarction. *JAMA Intern Med* 2017;177(2):254-62. doi: 10.1001/jamainternmed.2016.7701
124. Morrison RA, Jesdale BM, Dube CE, et al. Differences in Staff-Assessed Pain Behaviors among Newly Admitted Nursing Home Residents by Level of Cognitive Impairment. *Dementia and geriatric cognitive disorders* 2020;49(3):243-51. doi: <https://dx.doi.org/10.1159/000508096>
125. Morrison R, Jesdale B, Dube C, et al. Racial/Ethnic Differences in Staff-Assessed Pain Behaviors Among Newly Admitted Nursing Home Residents. *Journal of pain and symptom management* 2020 doi: <https://dx.doi.org/10.1016/j.jpainsymman.2020.08.034>
126. Wergeland Sorbye L, Steindal SA, Kalfoss MH, et al. Opioids, Pain Management, and Palliative Care in a Norwegian Nursing Home From 2013 to 2018. *Health services insights* 2019;12:1178632919834318. doi: <https://dx.doi.org/10.1177/1178632919834318>
127. Hunnicutt JN, Ulbricht CM, Tjia J, et al. Pain and pharmacologic pain management in long-stay nursing home residents. *Pain* 2017;158(6):1091-99. doi: <https://dx.doi.org/10.1097/j.pain.0000000000000887>
128. Cole CS, Blackburn J, Carpenter JS, et al. Pain and Associated Factors in Nursing Home Residents. *Pain Manag Nurs* 2023;24(4):384-92. doi: 10.1016/j.pmn.2023.03.002 [published Online First: 20230330]
129. Brennan PL, SooHoo S. Effects of Mental Health Disorders on Nursing Home Residents' Nine-Month Pain Trajectories. *Pain medicine (Malden, Mass)* 2020;21(3):488-500. doi: <https://dx.doi.org/10.1093/pm/pnz177>
130. Ahn H, Garvan C, Lyon D. Pain and Aggression in Nursing Home Residents With Dementia: Minimum Data Set 3.0 Analysis. *Nursing research* 2015;64(4):256-63. doi: <https://dx.doi.org/10.1097/NNR.0000000000000099>

131. Ahn H, Horgas A. Does pain mediate or moderate the effect of cognitive impairment on aggression in nursing home residents with dementia? *Asian nursing research* 2014;8(2):105-9. doi: <https://dx.doi.org/10.1016/j.anr.2014.03.003>
132. Downer B, Pritchard K, Thomas KS, et al. Improvement in Activities of Daily Living during a Nursing Home Stay and One-Year Mortality among Older Adults with Sepsis. *J Am Geriatr Soc* 2021;69(4):938-45. doi: 10.1111/jgs.16915 [published Online First: 20201105]
133. Gustavson AM, Falvey JR, Forster JE, et al. Predictors of Functional Change in a Skilled Nursing Facility Population. *Journal of geriatric physical therapy (2001)* 2019;42(3):189-95. doi: <https://dx.doi.org/10.1519/JPT.0000000000000137>
134. Levy CR, Zargoush M, Williams AE, et al. Sequence of Functional Loss and Recovery in Nursing Homes. *The Gerontologist* 2016;56(1):52-61. doi: <https://dx.doi.org/10.1093/geront/gnv099>
135. Hjaltadóttir I, Hallberg IR, Ekwall AK, et al. Health status and functional profile at admission of nursing home residents in Iceland over 11-year period. *Int J Older People Nurs* 2012;7(3):177-87. doi: 10.1111/j.1748-3743.2011.00287.x [published Online First: 20110801]
136. Singh S, Molina E, Meyer E, et al. Post-Acute Care Outcomes and Functional Status Changes of Adults with New Cancer Discharged to Skilled Nursing Facilities. *J Am Med Dir Assoc* 2022;23(11):1854-60. doi: 10.1016/j.jamda.2022.02.010 [published Online First: 20220323]
137. Shi S, Olivieri-Mui B, Oh G, et al. Analysis of Functional Recovery in Older Adults Discharged to Skilled Nursing Facilities and Then Home. *JAMA Netw Open* 2022;5(8):e2225452. doi: 10.1001/jamanetworkopen.2022.25452 [published Online First: 20220801]
138. Madrigal C, Kim J, Jiang L, et al. Delirium and Functional Recovery in Patients Discharged to Skilled Nursing Facilities After Hospitalization for Heart Failure. *JAMA Netw Open* 2021;4(3):e2037968. doi: 10.1001/jamanetworkopen.2020.37968 [published Online First: 20210301]
139. Kruse RL, Petroski GF, Mehr DR, et al. Activity of daily living trajectories surrounding acute hospitalization of long-stay nursing home residents. *Journal of the American Geriatrics Society* 2013;61(11):1909-18. doi: <https://dx.doi.org/10.1111/jgs.12511>
140. Talley KMC, Wyman JF, Savik K, et al. Restorative Care's Effect on Activities of Daily Living Dependency in Long-stay Nursing Home Residents. *The Gerontologist* 2015;55 Suppl 1:S88-98. doi: <https://dx.doi.org/10.1093/geront/gnv011>
141. Quigley PA, Campbell RR, Bulat T, et al. Incidence and cost of serious fall-related injuries in nursing homes. *Clinical nursing research* 2012;21(1):10-23. doi: <https://dx.doi.org/10.1177/1054773811414180>
142. Nazir A, Mueller C, Perkins A, et al. Falls and nursing home residents with cognitive impairment: new insights into quality measures and interventions. *Journal of the American Medical Directors Association* 2012;13(9):819.e1-6. doi: <https://dx.doi.org/10.1016/j.jamda.2012.07.018>
143. Leland NE, Gozalo P, Teno J, et al. Falls in newly admitted nursing home residents: a national study. *Journal of the American Geriatrics Society* 2012;60(5):939-45. doi: <https://dx.doi.org/10.1111/j.1532-5415.2012.03931.x>
144. Shaw BH, Borrel D, Sabbaghan K, et al. Relationships between orthostatic hypotension, frailty, falling and mortality in elderly care home residents. *BMC geriatrics* 2019;19(1):80. doi: <https://dx.doi.org/10.1186/s12877-019-1082-6>
145. Zhang N, Lu SF, Zhou Y, et al. Body Mass Index, Falls, and Hip Fractures Among Nursing Home Residents. *The journals of gerontology Series A, Biological sciences and medical sciences* 2018;73(10):1403-09. doi: <https://dx.doi.org/10.1093/gerona/gly039>
146. Lapane KL, Jesdale BM, Dube CE, et al. Sulfonylureas and risk of falls and fractures among nursing home residents with type 2 diabetes mellitus. *Diabetes research and clinical practice* 2015;109(2):411-9. doi: <https://dx.doi.org/10.1016/j.diabres.2015.05.009>

147. Yang Y, Mackey DC, Liu-Ambrose T, et al. Risk factors for hip impact during real-life falls captured on video in long-term care. *Osteoporosis international : a journal established as result of cooperation between the European Foundation for Osteoporosis and the National Osteoporosis Foundation of the USA* 2016;27(2):537-47. doi: <https://dx.doi.org/10.1007/s00198-015-3268-x>
148. Teresi JA, Ramirez M, Remler D, et al. Comparative effectiveness of implementing evidence-based education and best practices in nursing homes: effects on falls, quality-of-life and societal costs. *International journal of nursing studies* 2013;50(4):448-63. doi: <https://dx.doi.org/10.1016/j.ijnurstu.2011.07.003>
149. Marier A, Olsho LEW, Rhodes W, et al. Improving prediction of fall risk among nursing home residents using electronic medical records. *Journal of the American Medical Informatics Association : JAMIA* 2016;23(2):276-82. doi: <https://dx.doi.org/10.1093/jamia/ocv061>
150. Ritter AZ, Kosar CM, White EM, et al. Incidence and Outcomes of SARS-CoV-2 in Post-Acute Skilled Nursing Facility Care. *J Am Med Dir Assoc* 2022;23(8):1269-73. doi: 10.1016/j.jamda.2022.05.014 [published Online First: 20220523]
151. Hege A, Lane S, Spaulding T, et al. County-Level Social Determinants of Health and COVID-19 in Nursing Homes, United States, June 1, 2020-January 31, 2021. *Public Health Rep* 2022;137(1):137-48. doi: 10.1177/00333549211053666 [published Online First: 20211117]
152. Barnett ML, Waken RJ, Zheng J, et al. Changes in Health and Quality of Life in US Skilled Nursing Facilities by COVID-19 Exposure Status in 2020. *Jama* 2022;328(10):941-50. doi: 10.1001/jama.2022.15071
153. McArthur C, Saari M, Heckman GA, et al. Evaluating the Effect of COVID-19 Pandemic Lockdown on Long-Term Care Residents' Mental Health: A Data-Driven Approach in New Brunswick. *Journal of the American Medical Directors Association* 2021;22(1):187-92. doi: <https://dx.doi.org/10.1016/j.jamda.2020.10.028>
154. Levere M, Rowan P, Wysocki A. The Adverse Effects of the COVID-19 Pandemic on Nursing Home Resident Well-Being. *J Am Med Dir Assoc* 2021;22(5):948-54.e2. doi: 10.1016/j.jamda.2021.03.010 [published Online First: 20210320]
155. Shi SM, Bakaev I, Chen H, et al. Risk Factors, Presentation, and Course of Coronavirus Disease 2019 in a Large, Academic Long-Term Care Facility. *Journal of the American Medical Directors Association* 2020;21(10):1378-83.e1. doi: <https://dx.doi.org/10.1016/j.jamda.2020.08.027>
156. Ulyte A, Waken RJ, Epstein AM, et al. Medicare Skilled Nursing Facility Use and Spending Before and After Introduction of the Public Health Emergency Waiver During the COVID-19 Pandemic. *JAMA Intern Med* 2023;183(7):637-45. doi: 10.1001/jamainternmed.2023.0770
157. Tu W, Li R, Stump TE, et al. Age-specific rates of hospital transfers in long-stay nursing home residents. *Age Ageing* 2022;51(1) doi: 10.1093/ageing/afab232
158. Aryal K, Mowbray F, Gruneir A, et al. Nursing Home Resident Admission Characteristics and Potentially Preventable Emergency Department Transfers. *J Am Med Dir Assoc* 2022;23(8):1291-96. doi: 10.1016/j.jamda.2021.11.020 [published Online First: 20211215]
159. Gracner T, Agarwal M, Murali KP, et al. Association of Infection-Related Hospitalization With Cognitive Impairment Among Nursing Home Residents. *JAMA Netw Open* 2021;4(4):e217528. doi: 10.1001/jamanetworkopen.2021.7528 [published Online First: 20210401]
160. McArthur C, Rostami M, Saarela O, et al. Resident-Level Factors Associated with Hospitalization Rates for Newly Admitted Long-Term Care Residents in Canada: A Retrospective Cohort Study. *Canadian journal on aging = La revue canadienne du vieillissement* 2019;38(4):441-48. doi: <https://dx.doi.org/10.1017/S0714980818000715>
161. Middleton A, Downer B, Haas A, et al. Functional Status Is Associated With 30-Day Potentially Preventable Readmissions Following Skilled Nursing Facility Discharge Among Medicare

- Beneficiaries. *Journal of the American Medical Directors Association* 2018;19(4):348-54.e4. doi: <https://dx.doi.org/10.1016/j.jamda.2017.12.003>
162. Rivera-Hernandez M, Rahman M, Mor V, et al. Racial Disparities in Readmission Rates among Patients Discharged to Skilled Nursing Facilities. *Journal of the American Geriatrics Society* 2019;67(8):1672-79. doi: <https://dx.doi.org/10.1111/jgs.15960>
163. Thomas KS, Rahman M, Mor V, et al. Influence of hospital and nursing home quality on hospital readmissions. *The American journal of managed care* 2014;20(11):e523-31.
164. Hirth RA, Grabowski DC, Feng Z, et al. Effect of nursing home ownership on hospitalization of long-stay residents: an instrumental variables approach. *International journal of health care finance and economics* 2014;14(1):1-18.
165. Zuo SW, Ackenbom MF, Harris J. Racial Differences in Urinary Catheter Use Among Female Nursing Home Residents. *Urology* 2023;172:105-10. doi: 10.1016/j.urology.2022.11.026 [published Online First: 20221205]
166. Sura S, Shiozawa A, Ng D, et al. Higher Resource Utilization and Costs in Long-Term Nursing Home Residents With Overactive Bladder: A Retrospective Study of Medicare Beneficiaries. *Journal of the American Medical Directors Association* 2020 doi: <https://dx.doi.org/10.1016/j.jamda.2020.08.037>
167. Hacker ML, Tomaras MC, Sayce L, et al. Prevalence of Comorbid Spasticity and Urinary Incontinence in Residents of a Long-Term Care Facility. *Journal of gerontological nursing* 2020;46(10):35-42. doi: <https://dx.doi.org/10.3928/00989134-20200820-01>
168. Aparasu RR, Sura S, Earla JR, et al. Antimuscarinic Discontinuation in Patients with Overactive Bladder in Nursing Homes: A Retrospective Study of Medicare Beneficiaries. *Advances in therapy* 2020;37(8):3584-605. doi: <https://dx.doi.org/10.1007/s12325-020-01412-z>
169. Schumpf LF, Theill N, Scheiner DA, et al. Urinary incontinence and its association with functional physical and cognitive health among female nursing home residents in Switzerland. *BMC geriatrics* 2017;17(1):17. doi: <https://dx.doi.org/10.1186/s12877-017-0414-7>
170. Schluter PJ, Ward C, Arnold EP, et al. Urinary incontinence, but not fecal incontinence, is a risk factor for admission to aged residential care of older persons in New Zealand. *Neurourol Urodyn* 2017;36(6):1588-95. doi: 10.1002/nau.23160 [published Online First: 20161024]
171. Moga DC, Wu Q, Doshi P, et al. An investigation of factors predicting the type of bladder antimuscarinics initiated in Medicare nursing homes residents. *BMC geriatrics* 2017;17(1):295. doi: <https://dx.doi.org/10.1186/s12877-017-0690-2>
172. Bliss DZ, Gurvich OV, Eberly LE, et al. Racial disparities in primary prevention of incontinence among older adults at nursing home admission. *Neurourology and urodynamics* 2017;36(4):1124-30. doi: <https://dx.doi.org/10.1002/nau.23065>
173. Jerez-Roig J, Santos MM, Souza DLB, et al. Prevalence of urinary incontinence and associated factors in nursing home residents. *Neurourology and urodynamics* 2016;35(1):102-7. doi: <https://dx.doi.org/10.1002/nau.22675>
174. Blekken LE, Vinsnes AG, Gjeilo KH, et al. Exploring faecal incontinence in nursing home patients: a cross-sectional study of prevalence and associations derived from the Residents Assessment Instrument for Long-Term Care Facilities. *Journal of advanced nursing* 2016;72(7):1579-91. doi: <https://dx.doi.org/10.1111/jan.12932>
175. Zarowitz BJ, Allen C, O'Shea T, et al. Challenges in the Pharmacological Management of Nursing Home Residents with Overactive Bladder or Urinary Incontinence. *Journal of the American Geriatrics Society* 2015;63(11):2298-307. doi: <https://dx.doi.org/10.1111/jgs.13713>
176. Zarowitz BJ, Allen C, O'Shea T, et al. Clinical Burden and Nonpharmacologic Management of Nursing Facility Residents with Overactive Bladder and/or Urinary Incontinence. *The Consultant pharmacist : the journal of the American Society of Consultant Pharmacists* 2015;30(9):533-42. doi: <https://dx.doi.org/10.4140/TCP.n.2015.533>



177. Jerez-Roig J, Souza DL, Amaral FL, et al. Prevalence of fecal incontinence (FI) and associated factors in institutionalized older adults. *Arch Gerontol Geriatr* 2015;60(3):425-30. doi: 10.1016/j.archger.2015.02.003 [published Online First: 20150216]
178. Wu N, Marshall TS, Boulanger L, et al. Antimuscarinic use among individuals with urinary incontinence who reside in long-term care facilities. *International urology and nephrology* 2014;46(1):285-96. doi: <https://dx.doi.org/10.1007/s11255-013-0507-y>
179. Gorina Y, Schappert S, Bercovitz A, et al. Prevalence of incontinence among older americans. *Vital & health statistics Series 3, Analytical and epidemiological studies* 2014(36):1-33.
180. Xu D, Kane RL. Effect of urinary incontinence on older nursing home residents' self-reported quality of life. *Journal of the American Geriatrics Society* 2013;61(9):1473-81. doi: <https://dx.doi.org/10.1111/jgs.12408>
181. Moga DC, Carnahan RM, Lund BC, et al. Risks and benefits of bladder antimuscarinics among elderly residents of Veterans Affairs Community Living Centers. *Journal of the American Medical Directors Association* 2013;14(10):749-60. doi: <https://dx.doi.org/10.1016/j.jamda.2013.03.008>
182. Bliss DZ, Harms S, Garrard JM, et al. Prevalence of incontinence by race and ethnicity of older people admitted to nursing homes. *J Am Med Dir Assoc* 2013;14(6):451.e1-7. doi: 10.1016/j.jamda.2013.03.007 [published Online First: 20130424]
183. Temkin-Greener H, Cai S, Zheng NT, et al. Nursing home work environment and the risk of pressure ulcers and incontinence. *Health Serv Res* 2012;47(3 Pt 1):1179-200. doi: 10.1111/j.1475-6773.2011.01353.x [published Online First: 20111118]
184. Jockusch J, Riese F, Theill N, et al. Aspects of oral health and dementia among Swiss nursing home residents. *Aspekte der Mundgesundheit und Demenz bei Schweizer Pflegeheimbewohnern* 2020 doi: <https://dx.doi.org/10.1007/s00391-020-01739-w>
185. Raes S, Vandepitte S, De Smedt D, et al. The relationship of nursing home price and quality of life. *BMC health services research* 2020;20(1):987. doi: <https://dx.doi.org/10.1186/s12913-020-05833-y>
186. Pylypiv Shippee T, Parikh RR, Duan Y, et al. Measuring Nursing Home Quality of Life: Validated Measures Are Poorly Correlated With Proxies From MDS and Quality of Life Deficiency Citations. *J Am Med Dir Assoc* 2023;24(5):718-22.e4. doi: 10.1016/j.jamda.2023.03.014 [published Online First: 20230405]
187. Shippee TP, Henning-Smith C, Kane RL, et al. Resident- and Facility-Level Predictors of Quality of Life in Long-Term Care. *The Gerontologist* 2015;55(4):643-55. doi: <https://dx.doi.org/10.1093/geront/gnt148>
188. Kehyayan V, Hirdes JP, Tyas SL, et al. Predictors of Long-Term Care Facility Residents' Self-Reported Quality of Life With Individual and Facility Characteristics in Canada. *Journal of aging and health* 2016;28(3):503-29. doi: <https://dx.doi.org/10.1177/0898264315594138>
189. Goodwin JS, Li S, Zhou J, et al. Comparison of methods to identify long term care nursing home residence with administrative data. *BMC health services research* 2017;17(1):376. doi: <https://dx.doi.org/10.1186/s12913-017-2318-9>
190. Burton JK, Marwick CA, Galloway J, et al. Identifying care-home residents in routine healthcare datasets: a diagnostic test accuracy study of five methods. *Age and ageing* 2019;48(1):114-21. doi: 10.1093/ageing/afy137 [published Online First: 2018/08/21]
191. Medeiros PAd, Fortunato AR, Viscardi AAdF, et al. [Instruments developed for the management and care of the elderly in long-stay care institutions: a systematic review]. *Instrumentos desenvolvidos para o gerenciamento e cuidado de idosos em instituicoes de longa permanencia: uma revisao sistematica* 2016;21(11):3597-610. doi: <https://dx.doi.org/10.1590/1413-812320152111.09912015>
192. Grebe C, Brandenburg H. [Resident assessment instrument. Application options and relevance for Germany]. *Resident Assessment Instrument Anwendungsoptionen und Relevanz fur Deutschland* 2015;48(2):105-13. doi: <https://dx.doi.org/10.1007/s00391-015-0855-6>

193. Sales AE, Bostrom A-M, Bucknall T, et al. The use of data for process and quality improvement in long term care and home care: a systematic review of the literature. *Journal of the American Medical Directors Association* 2012;13(2):103-13. doi: <https://dx.doi.org/10.1016/j.jamda.2011.01.004>
194. van Soest-Poortvliet MC, van der Steen JT, Zimmerman S, et al. Measuring the quality of dying and quality of care when dying in long-term care settings: a qualitative content analysis of available instruments. *Journal of pain and symptom management* 2011;42(6):852-63. doi: <https://dx.doi.org/10.1016/j.jpainsymman.2011.02.018>
195. Kelly S, Cowan A, Akdur G, et al. Outcome measures from international older adult care home intervention research: a scoping review. *Age and Ageing* 2023;52(5) doi: 10.1093/ageing/afad069
196. Thomas KS, Wysocki A, Intrator O, et al. Finding Gertrude: The resident's voice in Minimum Data Set 3.0. *Journal of the American Medical Directors Association* 2014;15(11):802-6. doi: <https://dx.doi.org/10.1016/j.jamda.2014.01.012>
197. Gallant NL, Peckham A, Marchildon G, et al. Provincial legislative and regulatory standards for pain assessment and management in long-term care homes: a scoping review and in-depth case analysis. *BMC geriatrics* 2020;20(1):458. doi: <https://dx.doi.org/10.1186/s12877-020-01758-7>
198. Onder G, Carpenter I, Finne-Soveri H, et al. Assessment of nursing home residents in Europe: the Services and Health for Elderly in Long TERM care (SHELTER) study. *BMC Health Serv Res* 2012;12:5. doi: 10.1186/1472-6963-12-5 [published Online First: 20120109]
199. Foebel AD, Liperoti R, Gambassi G, et al. Prevalence and correlates of cardiovascular medication use among nursing home residents with ischemic heart disease: results from the SHELTER study. *Journal of the American Medical Directors Association* 2014;15(6):410-5. doi: <https://dx.doi.org/10.1016/j.jamda.2013.12.085>
200. Foebel AD, Liperoti R, Onder G, et al. Use of antipsychotic drugs among residents with dementia in European long-term care facilities: results from the SHELTER study. *Journal of the American Medical Directors Association* 2014;15(12):911-7. doi: <https://dx.doi.org/10.1016/j.jamda.2014.07.012>
201. Vetrano DL, Villani ER, Grande G, et al. Association of Polypharmacy With 1-Year Trajectories of Cognitive and Physical Function in Nursing Home Residents: Results From a Multicenter European Study. *Journal of the American Medical Directors Association* 2018;19(8):710-13. doi: <https://dx.doi.org/10.1016/j.jamda.2018.04.008>
202. Yamada Y, Denking MD, Onder G, et al. Dual Sensory Impairment and Cognitive Decline: The Results From the Shelter Study. *The journals of gerontology Series A, Biological sciences and medical sciences* 2016;71(1):117-23. doi: <https://dx.doi.org/10.1093/gerona/glv036>
203. Yamada Y, Denking MD, Onder G, et al. Joint Associations of Dual Sensory Impairment and No-Activity Involvement With 1-Year Mortality in Nursing Homes: Results From the SHELTER Study. *The journals of gerontology Series A, Biological sciences and medical sciences* 2016;71(5):643-8. doi: <https://dx.doi.org/10.1093/gerona/glv191>
204. Huang Y, Carpenter I. Identifying elderly depression using the Depression Rating Scale as part of comprehensive standardised care assessment in nursing homes. *Aging Ment Health* 2011;15(8):1045-51. doi: 10.1080/13607863.2011.583626 [published Online First: 20110815]
205. Onder G, Liperoti R, Fialova D, et al. Polypharmacy in nursing home in Europe: results from the SHELTER study. *J Gerontol A Biol Sci Med Sci* 2012;67(6):698-704. doi: 10.1093/gerona/glr233 [published Online First: 20120104]
206. Frijters DH, van der Roest HG, Carpenter IG, et al. The calculation of quality indicators for long term care facilities in 8 countries (SHELTER project). *BMC Health Serv Res* 2013;13:138. doi: 10.1186/1472-6963-13-138 [published Online First: 20130415]

207. Frijters DHM, van der Roest HG, Carpenter IGI, et al. The calculation of quality indicators for long term care facilities in 8 countries (SHELTER project). *BMC health services research* 2013;13:138. doi: <https://dx.doi.org/10.1186/1472-6963-13-138>
208. Lukas A, Mayer B, Fialová D, et al. Treatment of pain in European nursing homes: results from the Services and Health for Elderly in Long TERM Care (SHELTER) study. *J Am Med Dir Assoc* 2013;14(11):821-31. doi: 10.1016/j.jamda.2013.04.009 [published Online First: 20130606]
209. Lukas A, Mayer B, Fialová D, et al. Pain characteristics and pain control in European nursing homes: cross-sectional and longitudinal results from the Services and Health for Elderly in Long TERM care (SHELTER) study. *J Am Med Dir Assoc* 2013;14(6):421-8. doi: 10.1016/j.jamda.2012.12.010 [published Online First: 20130201]
210. Vetrano DL, Tosato M, Colloca G, et al. Polypharmacy in nursing home residents with severe cognitive impairment: results from the SHELTER Study. *Alzheimers Dement* 2013;9(5):587-93. doi: 10.1016/j.jalz.2012.09.009 [published Online First: 20121208]
211. Foebel AD, Liperoti R, Gambassi G, et al. Prevalence and correlates of cardiovascular medication use among nursing home residents with ischemic heart disease: results from the SHELTER study. *J Am Med Dir Assoc* 2014;15(6):410-5. doi: 10.1016/j.jamda.2013.12.085 [published Online First: 20140220]
212. Gindin J, Shochat T, Chetrit A, et al. Insomnia in long-term care facilities: a comparison of seven European countries and Israel: the Services and Health for Elderly in Long TERM care study. *J Am Geriatr Soc* 2014;62(11):2033-9. doi: 10.1111/jgs.13099 [published Online First: 20141030]
213. Yamada Y, Vlachova M, Richter T, et al. Prevalence and correlates of hearing and visual impairments in European nursing homes: results from the SHELTER study. *J Am Med Dir Assoc* 2014;15(10):738-43. doi: 10.1016/j.jamda.2014.05.012 [published Online First: 20140628]
214. Szczerbńska K, Topinková E, Brzyski P, et al. The characteristics of diabetic residents in European nursing homes: results from the SHELTER study. *J Am Med Dir Assoc* 2015;16(4):334-40. doi: 10.1016/j.jamda.2014.11.009 [published Online First: 20141219]
215. Yamada Y, Denking MD, Onder G, et al. Joint Associations of Dual Sensory Impairment and No-Activity Involvement With 1-Year Mortality in Nursing Homes: Results From the SHELTER Study. *J Gerontol A Biol Sci Med Sci* 2016;71(5):643-8. doi: 10.1093/gerona/glv191 [published Online First: 20151118]
216. Vetrano DL, Villani ER, Grande G, et al. Association of Polypharmacy With 1-Year Trajectories of Cognitive and Physical Function in Nursing Home Residents: Results From a Multicenter European Study. *J Am Med Dir Assoc* 2018;19(8):710-13. doi: 10.1016/j.jamda.2018.04.008 [published Online First: 20180531]
217. Ten Koppel M, Onwuteaka-Philipsen BD, Pasman HR, et al. Are older long term care residents accurately prognosticated and consequently informed about their prognosis? Results from SHELTER study data in 5 European countries. *PLoS One* 2018;13(7):e0200590. doi: 10.1371/journal.pone.0200590 [published Online First: 2018/07/19]
218. Gindin J, Shochat T, Chetrit A, et al. Insomnia in long-term care facilities: a comparison of seven European countries and Israel: the Services and Health for Elderly in Long TERM care study. *Journal of the American Geriatrics Society* 2014;62(11):2033-9. doi: <https://dx.doi.org/10.1111/jgs.13099>
219. Cherubini A, Eusebi P, Dell'Aquila G, et al. Predictors of hospitalization in Italian nursing home residents: the U.L.I.S.S.E. project. *Journal of the American Medical Directors Association* 2012;13(1):84.e5-10. doi: <https://dx.doi.org/10.1016/j.jamda.2011.04.001>
220. Cherubini A, Ruggiero C, Dell'Aquila G, et al. Underrecognition and undertreatment of dementia in Italian nursing homes. *Journal of the American Medical Directors Association* 2012;13(8):759.e7-13. doi: <https://dx.doi.org/10.1016/j.jamda.2012.05.015>

221. Fedecostante M, Dell'Aquila G, Eusebi P, et al. Predictors of Functional Changes in Italian Nursing Home Residents: The U.L.I.S.S.E. Study. *Journal of the American Medical Directors Association* 2016;17(4):306-11. doi: <https://dx.doi.org/10.1016/j.jamda.2015.11.004>
222. Landi F, Lattanzio F, Dell'Aquila G, et al. Prevalence and potentially reversible factors associated with anorexia among older nursing home residents: results from the ULISSE project. *Journal of the American Medical Directors Association* 2013;14(2):119-24. doi: <https://dx.doi.org/10.1016/j.jamda.2012.10.022>
223. Musa MK, Akdur G, Brand S, et al. The uptake and use of a minimum data set (MDS) for older people living and dying in care homes: a realist review. *BMC Geriatrics* 2022;22(1):33. doi: 10.1186/s12877-021-02705-w
